# Supplementary material for: The mechanism of spray electrification: the waterfall effect
Source: Copernicus journal article supplement (doi:10.5194/acp-2015-892), 2016-04-13
Supplement: Supplementary file [file acp-2015-892-AC2-supplement.pdf]

Referee 4 is disturbed by the departure of the paper from the conventional format used to describe new experimental results. As discussed above, this paper examines the consequences of a new idea, the origin and application of the spontaneous adsorption of hydroxide ions to nanoscopic droplets formed in a waterfall and by other means. The only 'new result' is the description of the effect of the adsorbed hydroxide. The paper could, of course, at the expense of a much increased length, describe all of the observations reported in the literature since the original and perceptive one by Lenart in 1892. But this is unnecessary, especially so in this case, because there is consensus on the matter – the droplets are negatively charged. There are no new experimental results or data. The only new 'result' is the new interpretation of the origin of the charge; in this sense the entire paper is the Result and associated Discussion.
